# Supplementary material
Source: HighWire-hosted journal article supplement (https://bmjopen.bmj.com/content/13/7/e072706)
Supplement: inline-supplementary-material-1 [file inline-supplementary-material-1.pdf]

**Supplementary File 1: Search strategy**

Medline, PsycINFO Set 1 AND (Set 2 OR Set 3)

Embase and CINAHL Set 1 AND Set 2 AND Set 3

- Embase and CINAHL combined differently due to size of results being retrieved

Medline

Set 1 Patient Safety monitoring/reporting

((exp patient safety/ or \*risk management/ or safety management/ or \*Patient Satisfaction/) and (exp Classification/ or Documentation/ or Data Collection/ or \*"Surveys and Questionnaires"/))

or

(safety event\$ or event report\$ or near-miss event\$ or patient complaint\$ or incident report\*).tw,kf

or

((("hospital safety" or "patient safety" or "adverse event\*" or "patient complain\*" or "family complain\*" or "parent\* complain\*" or "patient care\*" or "safety event\*" or "never event\*" or incident\$ or "near-miss\*" or accident\*) adj ("monitor\* system\*" or "report\* system\*" or report\* or investigat\* or analys\* or data collect\* or information collect\*).tw,kf

Or

((("Failure mode" adj2 "effect analys\$s") or FMEA or "Retrospective chart review" or "Administrative datasets" or "Mortality reviews" or "Root cause analys\$s" or Autopsies or ("Morbidity and mortality") adj (conference\$) or "Malpractice claim\$" or "Data warehouse" or "Executive Walk round\$" or "executive walkround\$" or ((Natural language processing) adj2 ("real-time trigger\*")) or "Trigger tool\$" or "Patient safety indicator\*")).ti,ab

Set 2 Equity

\*"Communication Barriers"/ or \*language/ or ("Limited English proficien\*" or LEP or "limited language proficien\*" or "Language barrier\*" or "Communication Barrier\*" or communicat\*).tw,kf

or

\*Health Services Accessibility/ or \*Health Status Disparities/ or \*Healthcare Disparities/ or \*Cultural Deprivation/ or \*Poverty/ or racism/ or \*equity/ or \*"Social Determinants of Health"/

Or

(EDI or equity or diversity or inclusion).tw,kf

or

((system\* or institutional\* or structur\* or attitude\* or bias\* or discriminat\*) adj (Racis\* or racial\*)).tw,kf

Or

((social or socioeconomic or racial\* or cultur\* or ethnic\* or wealth or income) adj (inequal\* or unequal\* or disparit\* or inequit\*)).tw,kf

or

\*Vulnerable Populations/ or Indigenous Canadians/ or Health Services, Indigenous/ or \*Social Marginalization/

or

((Vulnerable or "hard-to-reach" or disadvantage\* or marginali\$ed or poor or "low income" or "low socioeconomic status" or "low SES" or immigrant\$ or newcomer\$ or new-comer\$ or refugee\* or minority or ethnic\* or racial\* or cultural minorit\* or religious minorit\* or equity-deserving or "native american\*" or "native Canadian\*" or "First Nations" or Metis or inuit or Innu or "Alaskan native\*" or "North American Indian\$" or rural or underrepresented or urban or disabilit\* or disabl\*) adj (population\$ or group\$ or person\$ or people\$ or individual\$ or communit\*)).tw,kf

Set 3 Quality improvement

\*Professional-Patient Relations/ or \*"Quality of Health Care"/ or \*Health Services Administration/st or

\*"Delivery of Health Care"/og or \*"Total Quality Management"/

or

((healthcare or health?care or health service\$ or patient care) adj (quality improvement or TQM or total quality management or quality or QI)).tw,kf

Embase

Set 1 Patient Safety monitoring/reporting

((exp patient safety/ or \*risk management/ or safety/ or \*Patient Satisfaction/) and (\*Classification/ or Documentation/ or information processing/ or \*Questionnaires/))

or

(safety event\$ or event report\$ or near-miss event\$ or patient complaint\$ or incident report\*).tw,kf

or

((("hospital safety" or "patient safety" or "adverse event\*" or "patient complain\*" or "family complain\*" or "parent\* complain\*" or "patient care\*" or "safety event\*" or "never event\*" or incident\$ or "near-miss\*" or accident\*) adj ("monitor\* system\*" or "report\* system\*" or report\* or investigat\* or analys\* or data collect\* or information collect\*).tw,kf

((("Failure mode" adj2 "effect analys\$s") or FMEA or "Retrospective chart review" or "Administrative datasets" or "Mortality reviews" or "Root cause analys\$s" or Autopsies or ("Morbidity and mortality") adj (conference\$)) or "Malpractice claim\$" or "Data warehouse" or "Executive Walk round\$" or "executive walkround\$" or ((Natural language processing) adj2 ("real-time trigger\*")) or "Trigger tool\$" or "Patient safety indicator\*").ti,ab

Set 2 Equity

\*"Communication Barrier"/ or \*language ability/ or ("Limited English proficien\*" or LEP or "limited language proficien\*" or "Language barrier\*" or "Communication Barrier\*" or communicat\*).tw,kf

or

\*Health care access/ or \*Health disparity/ or \*Health care disparity/ or \*Cultural Deprivation/ or \*Poverty/ or racism/ or \*health equity/ or \*"Social Determinants of Health"/

Or

(EDI or equity or diversity or inclusion).tw,kf

or

((system\* or institutional\* or structur\* or attitude\* or bias\* or discriminat\*) adj (Racis\* or racial\*).tw,kf

Or

((social or socioeconomic or racial\* or cultur\* or ethnic\* or wealth or income) adj (inequal\* or unequal\* or disparit\* or inequit\*).tw,kf

or

\*Vulnerable Population/ or Canadians aboriginals/ or Indigenous health care/ or \*Social exclusion/

or

((Vulnerable or "hard-to-reach" or disadvantage\* or marginali\$ed or poor or "low income" or "low socioeconomic status" or "low SES" or immigrant\$ or newcomer\$ or new-comer\$ or refugee\* or minority or ethnic\* or racial\* or cultural minorit\* or religious minorit\* or equity-deserving or "native american\*" or "native Canadian\*" or "First Nations" or Metis or Inuit or Innu or "Alaskan native\*" or "North American Indian\$" or rural or underrepresented or urban or disabilit\* or disabl\*) adj (population\$ or group\$ or person\$ or people\$ or individual\$ or communit\*).tw,kf

Set 3 Quality improvement

\*Professional-Patient Relations/ or \*"Health Care quality"/ or \*Health Service/ or

\*"health care delivery"/ or \*"Total Quality Management"/

or

((healthcare or health?care or health service\$ or patient care) adj (quality improvement or TQM or total quality management or quality or QI)).tw,kf

PsycINFO

Set 1 Patient Safety monitoring/reporting

((exp patient safety/ or exp risk management/ or safety/ or \*Client Satisfaction/) and (exp "Classification (Cognitive Process)"/ or Medical records/ or Data Collection/ or \*questionnaires/))

or

(safety event\$ or event report\$ or near-miss event\$ or patient complaint\$ or incident report\*).tw,id

or

((("hospital safety" or "patient safety" or "adverse event\*" or "patient complain\*" or "family complain\*" or "parent\* complain\*" or "patient care\*" or "safety event\*" or "never event\*" or incident\$ or "near-miss\*" or accident\*) adj ("monitor\* system\*" or "report\* system\*" or report\* or investigat\* or analys\* or data collect\* or information collect\*).tw,id

((("Failure mode" adj2 "effect analys\$s") or FMEA or "Retrospective chart review" or "Administrative datasets" or "Mortality reviews" or "Root cause analys\$s" or Autopsies or ("Morbidity and mortality") adj (conference\$)) or "Malpractice claim\$" or "Data warehouse" or "Executive Walk round\$" or "executive walkround\$" or ((Natural language processing) adj2 ("real-time trigger\*")) or "Trigger tool\$" or "Patient safety indicator\*")).ti,ab

### Set 2 Equity

\*"Communication Barriers"/ or language proficiency/ or ("Limited English proficien\*" or LEP or "limited language proficien\*" or "Language barrier\*" or "Communication Barrier\*" or communicat\*).tw,id

or

Health Disparities/ or Health Care Services/ or \*Health Care Delivery/ or \*Health Care Access/ or Cultural Deprivation/ or \*Poverty/ or racism/ or \*equity/

or

(EDI or equity or diversity or inclusion).tw,id

or

((system\* or institutional\* or structur\* or attitude\* or bias\* or discriminat\*) adj (Racis\* or racial\*)).tw,id

Or

((social or socioeconomic or racial\* or cultur\* or ethnic\* or wealth or income) adj (inequal\* or unequal\* or disparit\* or inequit\*)).tw,id

or

\*At risk Populations/ or Indigenous Populations/ or Marginalization/

or

((Vulnerable or "hard-to-reach" or disadvantage\* or marginali\$ed or poor or "low income" or "low socioeconomic status" or "low SES" or immigrant\$ or newcomer\$ or new-comer\$ or refugee\* or minority or ethnic\* or racial\* or cultural minorit\* or religious minorit\* or equity-deserving or "native american\*" or "native Canadian\*" or "First Nations" or Metis or inuit or Innu or "Alaskan native\*" or "North American Indian\$" or rural or underrepresented or urban or disabilit\* or disabl\*) adj (population\$ or group\$ or person\$ or people\$ or individual\$ or communit\*)).tw,id

### Set 3 Quality improvement

"Quality of Care"/ or Mental Health Services/ or "Health Care Delivery"/ or "Quality control"/

or

((healthcare or health?care or health service\$ or patient care) adj (quality improvement or TQM or total quality management or quality or QI)).tw,id

CINAHL

Set 1 Patient Safety monitoring/reporting

((MH patient safety+ or MM risk management or MH safety or MM Patient Satisfaction) and (MH Classification or MH Documentation or MH Data Collection or MM Surveys))

or

TX (safety event\$ or event report\$ or near-miss event\$ or patient complaint\$ or incident report\*)

or

TX (("hospital safety" or "patient safety" or "adverse event\*" or "patient complain\*" or "family complain\*" or "parent\* complain\*" or "patient care\*" or "safety event\*" or "never event\*" or incident\$ or "near-miss\*" or accident\*) w1 ("monitor\* system\*" or "report\* system\*" or report\* or investigat\* or analys\* or data collect\* or information collect\*))

TI (((("Failure mode" w2 "effect analys\$s") or FMEA or "Retrospective chart review" or "Administrative datasets" or "Mortality reviews" or "Root cause analys\$s" or Autopsies or ("Morbidity and mortality") w1 (conference\$)) or "Malpractice claim\$" or "Data warehouse" or "Executive Walk round\$" or "executive walkround\$" or ((Natural language processing) w2 ("real-time trigger\*")) or "Trigger tool\$" or "Patient safety indicator\*")) OR AB (((("Failure mode" w2 "effect analys\$s") or FMEA or "Retrospective chart review" or "Administrative datasets" or "Mortality reviews" or "Root cause analys\$s" or Autopsies or ("Morbidity and mortality") w1 (conference\$)) or "Malpractice claim\$" or "Data warehouse" or "Executive Walk round\$" or "executive walkround\$" or ((Natural language processing) w2 ("real-time trigger\*")) or "Trigger tool\$" or "Patient safety indicator\*"))

Set 2 Equity

MM "Communication Barriers" or MM language or TX ("Limited English proficien\*" or LEP or "limited language proficien\*" or "Language barrier\*" or "Communication Barrier\*" or communicat\*)

or

MM Health Services Accessibility or MM Health Status Disparities or MM Healthcare Disparities or MM Cultural Deprivation or MM Poverty or MH racism or MM racial equity or MM "Social Determinants of Health"

Or

TX (EDI or equity or diversity or inclusion)

or

TX ((system\* or institutional\* or structur\* or attitude\* or bias\* or discriminat\*) w1 (Racis\* or racial\*))

Or

TX ((social or socioeconomic or racial\* or cultur\* or ethnic\* or wealth or income) w1 (inequal\* or unequal\* or disparit\* or inequit\*))

or

MM Special Populations or MH Aboriginal Canadians or MH Health Services, Indigenous

or

TX ((Vulnerable or "hard-to-reach" or disadvantage\* or marginali\$ed or poor or "low income" or "low socioeconomic status" or "low SES" or immigrant\$ or newcomer\$ or new-comer\$ or refugee\* or minority or ethnic\* or racial\* or cultural minorit\* or religious minorit\* or equity-deserving or "native american\*" or "native Canadian\*" or "First Nations" or Metis or inuit or Innu or "Alaskan native\*" or "North American Indian\$" or rural or underrepresented or urban or disabilit\* or disabl\*) w1 (population\$ or group\$ or person\$ or people\$ or individual\$ or communit\*))

Set 3 Quality improvement

MM Professional-Patient Relations or MM "Quality of Health Care" or MM Health Services Administration or MM "Health Care Delivery" or MM "Quality improvement"

or

TX ((healthcare or health?care or health service\$ or patient care) w1 (quality improvement or TQM or total quality management or quality or QI))
