# Supplementary material
Source: HighWire-hosted journal article supplement (https://bmjopen.bmj.com/content/13/7/e072706)
Supplement: inline-supplementary-material-2 [file inline-supplementary-material-2.pdf]

**Supplementary File 2: Prompts to assess quality of papers<sup>46</sup>**

1. Are the aims and objectives of the research clearly stated?
2. Is the research design clearly specified and appropriate for the aims and objectives of the research?
3. Do the researchers provide a clear account of the process by which their findings were produced?
4. Do the researchers display enough data to support their interpretations and conclusions?
5. Is the method of analysis appropriate and adequately explicated?
